# Supplementary material
Source: publisher figshare collection journal article supplement (https://acs.figshare.com/ndownloader/files/9724882)
Supplement: Supplementary file 1 [file 9724882]

## Supporting Information

### **Citric Acid/Cysteine Modified Cellulose-based Materials: Green Preparation and Its Applications in Anti-counterfeiting, Chemical Sensing, and UV Shielding**

Heng Chen,<sup>†</sup> Xiaohui Yan,<sup>‡</sup> Qian Feng,<sup>†</sup> Pengchao Zhao,<sup>†</sup> Xiayi Xu,<sup>†</sup> Dickon H. L.  
Ng,<sup>§</sup> Liming Bian<sup>\*†‡§//<sup>⊥</sup>#</sup>

<sup>†</sup>Department of Biomedical Engineering, The Chinese University of Hong Kong,  
Shatin, New Territories 999077, Hong Kong, P. R. China

<sup>‡</sup>Department of Physics, The Chinese University of Hong Kong, Shatin, New  
Territories 999077, Hong Kong, P. R. China

<sup>§</sup>Shun Hing Institute of Advanced Engineering, The Chinese University of Hong  
Kong, Shatin, New Territories 999077, Hong Kong, P. R. China

// Shenzhen Research Institute, The Chinese University of Hong Kong, CUHK  
Shenzhen Research Institute Building, No.10, 2nd Yuexing Road, Nanshan District,  
Shenzhen 518057, P. R. China

<sup>⊥</sup>China Orthopedic Regenerative Medicine Group (CORMed), Hangzhou 310058, P.  
R. China

<sup>#</sup>Centre for Novel Biomaterials, The Chinese University of Hong Kong, Shatin, New  
Territories 999077, Hong Kong, P. R. China

Number of pages: S1-S7

Number of figures: Figure S1- Figure S11

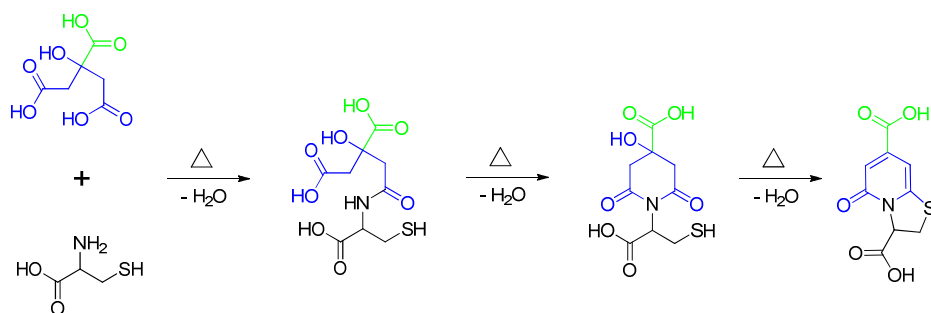

**Figure S1.** Schematic illustration of CCF formation from citric acid and cysteine through multi-dehydration.

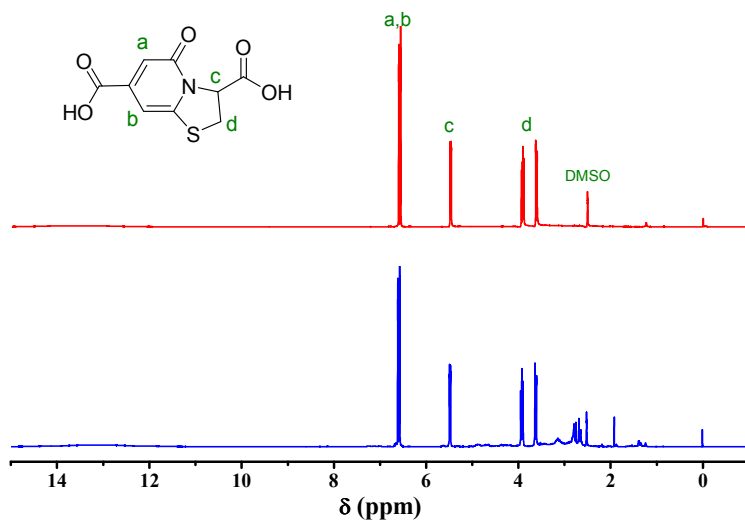

**Figure S2.**  $^1H$  NMR spectra of TPA (red curve) and crude product of heating citric acid and cysteine (blue curve).

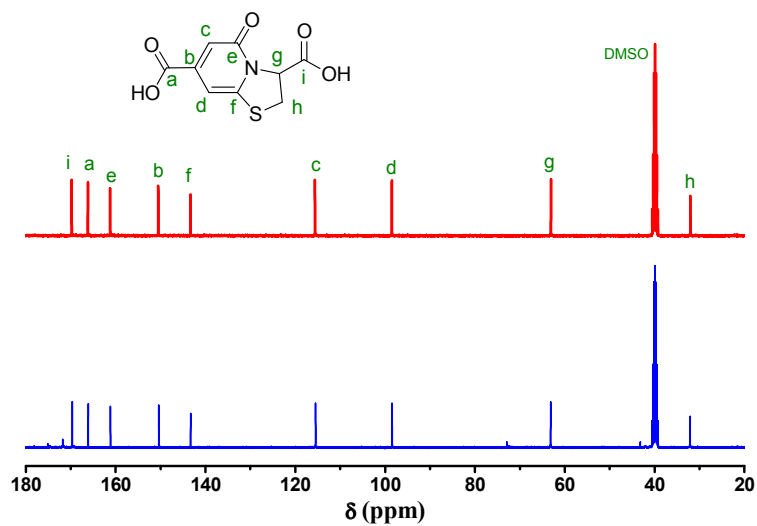

**Figure S3.**  $^{13}\text{C}$  NMR spectra of TPA (red curve) and crude product of heating citric acid and cysteine (blue curve).

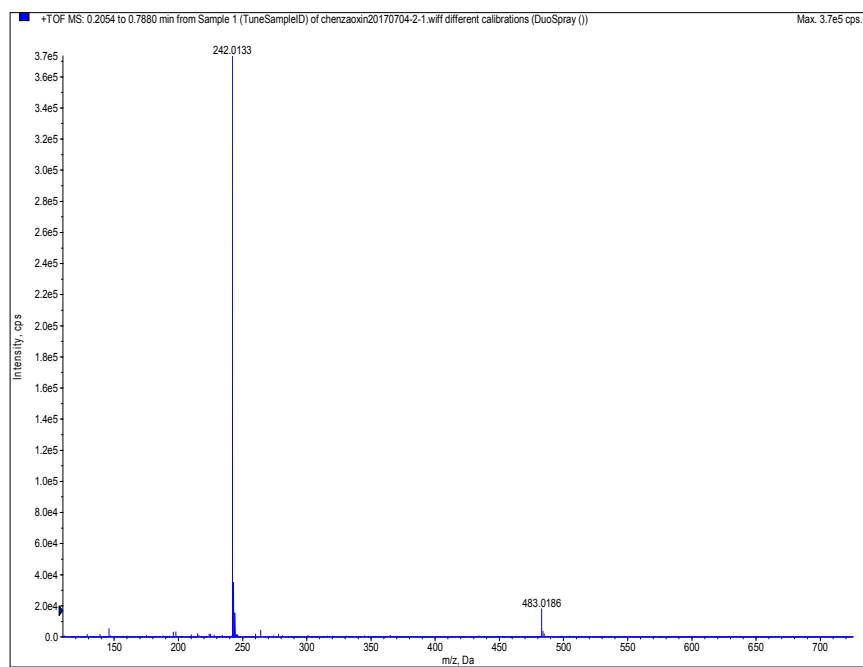

**Figure S4.** ESI-MS spectrum of TPA.

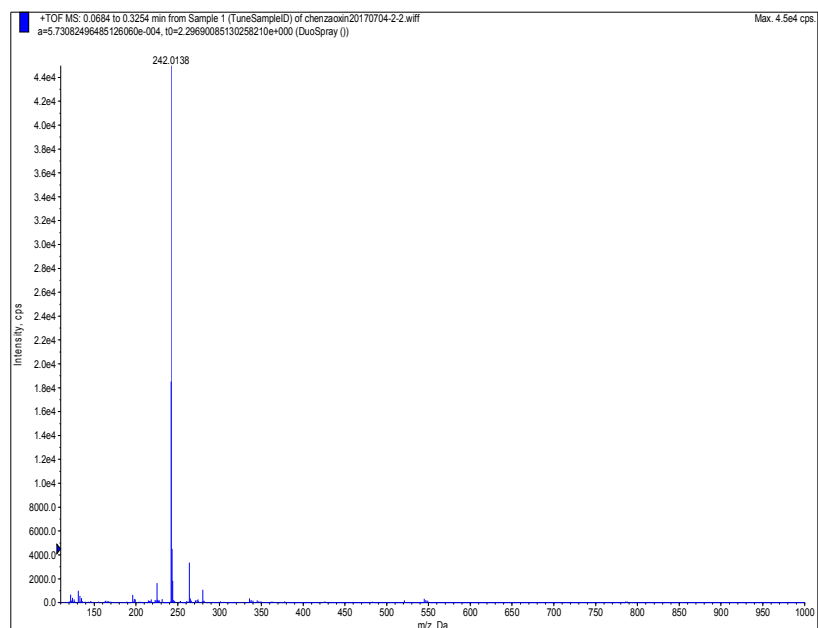

**Figure S5.** ESI-MS spectrum of crude product of heating citric acid and cysteine.

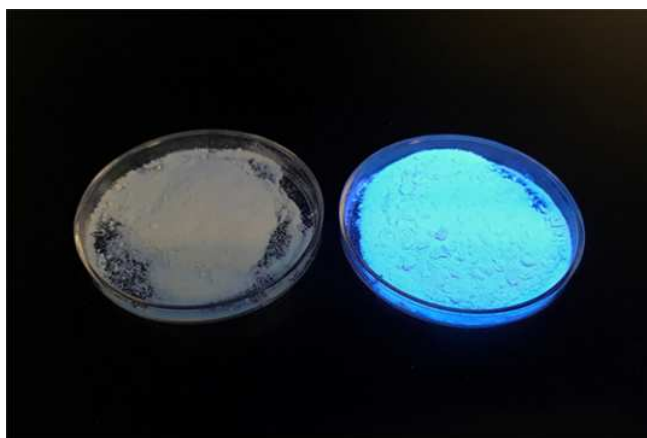

**Figure S6.** Digital photographs of CCF powders (left) and CCF-modified cellulose powders (right) under UV light ( $\lambda_{\text{ex}} = 365 \text{ nm}$ ) irradiation. CCF powders were prepared according to Shi et al's paper.<sup>31</sup>

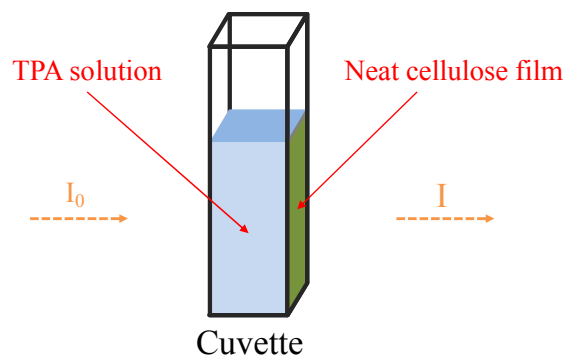

**Figure S7.** Schematic diagram of determining UV-Vis absorption of neat cellulose film in TPA solution.

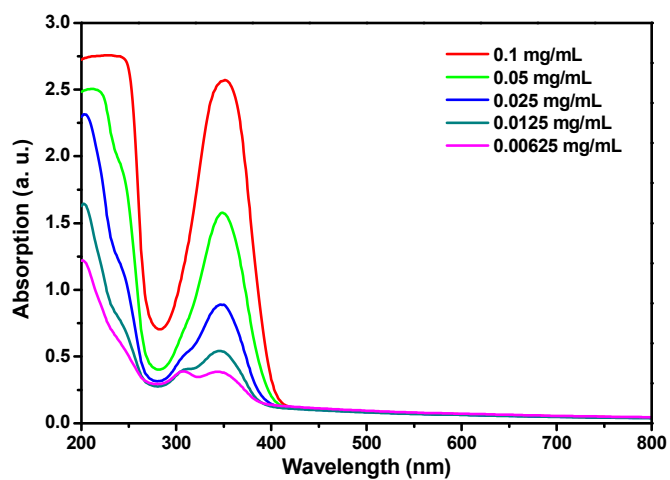

**Figure S8.** UV-Vis spectra of neat cellulose film in TPA aqueous solutions of different concentrations.

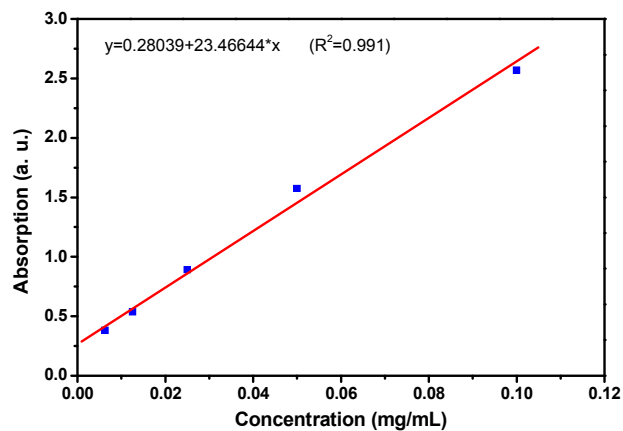

**Figure S9.** Standard calibration curve of neat cellulose film in TPA aqueous solutions of different concentrations (absorbance measured at 351 nm).

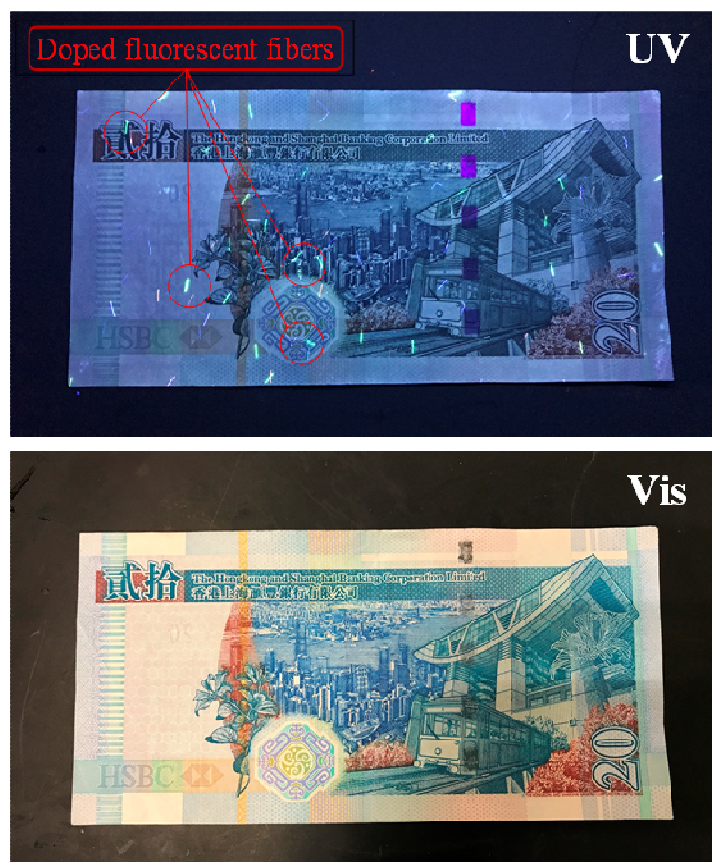

**Figure S10.** Doped fluorescent fibers in Hong Kong dollar banknote observed under UV light ( $\lambda_{\text{ex}} = 365 \text{ nm}$ ) (top) and visible light (bottom) irradiation.

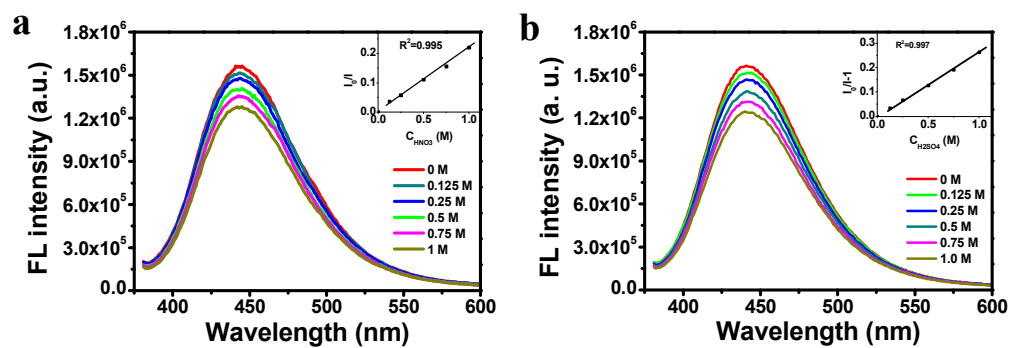

**Figure S11.** Emission spectra of CCF-modified cellulose film in aqueous  $\text{HNO}_3$  solutions of different concentrations (a), and that of CCF-modified cellulose film in aqueous  $\text{H}_2\text{SO}_4$  solutions of different concentrations (b).
